# Supplementary material for: A new functionalized mesoporous matrix supported Pd(ii)-Schiff base complex: an efficient catalyst for the Suzuki–Miyaura coupling reaction
Source: Royal Society of Chemistry journal article supplement (doi:10.1039/c003142a), 2010-01-01
Supplement: c003142a.pdf [file c003142a.pdf]

*Electronic Supplementary Information for*

**A new functionalized mesoporous matrix supported Pd(II)-Schiff base complex: an efficient catalyst for the Suzuki-Miyaura coupling reaction**

**Koushik Dhara,<sup>\*a</sup> Krishanu Sarkar,<sup>b</sup> Dipankar Srimani,<sup>c</sup> Subrata Kumar Saha,<sup>d</sup> Pabitra Chattopadhyay,<sup>e</sup> and Asim Bhaumik<sup>\*f</sup>**

<sup>a</sup>*Department of Chemistry, Sambhu Nath College, Labpur, Birbhum 731303, West Bengal, India,*

<sup>b</sup>*Department of Chemistry, Netaji Mahavidyalaya, Arambagh, Hooghly 712601,*

<sup>c</sup>*Department of Organic Chemistry, Indian Association for the Cultivation of Science, Kolkata 700 032, India,*

<sup>d</sup>*Department of Physics, Sambhu Nath College, Labpur, Birbhum 731303, West Bengal, India,*

<sup>e</sup>*Department of Chemistry, Burdwan University, Golapbag, Burdwan 713 104, West Bengal, India,*

<sup>f</sup>*Department of Materials Science, and Centre for Advanced Materials, Indian Association for the Cultivation of Science, Jadavpur, Kolkata 700 032, India*

\*Authors to whom correspondence should be addressed

E-mail: koushikdhara@rediffmail.com (K. Dhara)

Phone: +919433125327

E-mail: msab@iacs.res.in (A. Bhaumik)

Fax: +913324732805

## Spectroscopic Characterization ( $^1\text{H}$ , $^{13}\text{C}$ ) of cross-coupled products:

All  $^1\text{H}$  NMR (300 MHz),  $^{13}\text{C}$  NMR (75 MHz) spectra were recorded on a Bruker-Avance DPX300 for a  $\text{CDCl}_3$  solution and reported in ppm ( $\delta$ ).

**Compound 1a:**<sup>1</sup> (Table 2, entry 1)  $^1\text{H}$  NMR ( $\text{CDCl}_3$ )  $\delta$  7.45-7.53 (m, 3H), 7.63 (d,  $J = 9.0$  Hz, 2H), 7.74 (d,  $J = 9.0$  Hz, 2H), 8.30 (d,  $J = 9.0$  Hz, 2H);  $^{13}\text{C}$  NMR ( $\text{CDCl}_3$ )  $\delta$  124.04, 127.34, 127.74, 128.89, 129.12, 138.69, 147.04, 147.56.

**Compound 1b:**<sup>2</sup> (Table 2, entry 2)  $^1\text{H}$  NMR ( $\text{CDCl}_3$ )  $\delta$  7.43-7.54 (m, 3H), 7.59-7.64 (m, 3H), 7.93 (d,  $J = 7.61$  Hz, 1H), 8.21 (d,  $J = 8.25$  Hz, 1H), 8.45 (s, 1H);  $^{13}\text{C}$  NMR ( $\text{CDCl}_3$ )  $\delta$  122.27, 122.42, 127.54, 128.98, 129.59, 130.15, 133.43, 138.99, 143.21, 149.12.

**Compound 1c:**<sup>2</sup> (Table 2, entry 3)  $^1\text{H}$  NMR ( $\text{CDCl}_3$ )  $\delta$  7.41-7.51 (m, 3H), 7.62-7.65 (m, 2H), 7.70 (d,  $J = 8.4$  Hz, 2H), 7.95 (d,  $J = 8.22$  Hz, 2H), 10.06 (s, 1H);  $^{13}\text{C}$  NMR ( $\text{CDCl}_3$ )  $\delta$  127.79, 128.11, 128.89, 129.43, 130.69, 135.60, 140.13, 147.62, 192.37.

**Compound 1d:**<sup>1</sup> (Table 2, entry 4)  $^1\text{H}$  NMR ( $\text{CDCl}_3$ )  $\delta$  7.38-7.51 (m, 3H), 7.59-7.65 (m, 3H), 7.86 (dd,  $J = 7.68, 1.53$  Hz, 2H), 8.11 (s, 1H), 10.09 (s, 1H);  $^{13}\text{C}$  NMR ( $\text{CDCl}_3$ )  $\delta$  127.28, 128.14, 128.33, 128.75, 129.13, 129.62, 133.18, 137.06, 139.83, 142.30, 192.44.

**Compound 1e:**<sup>2</sup> (Table 2, entry 5)  $^1\text{H}$  NMR ( $\text{CDCl}_3$ )  $\delta$  7.39-7.69 (m, 8H), 8.06 (d,  $J = 7.80$  Hz, 1H), 10.01 (s, 1H);  $^{13}\text{C}$  NMR ( $\text{CDCl}_3$ )  $\delta$  127.66, 127.87, 128.22, 128.53, 130.20, 130.87, 133.66, 133.82, 137.85, 146.07, 192.53.

**Compound 1f:**<sup>2</sup> (Table 2, entry 6)  $^1\text{H}$  NMR ( $\text{CDCl}_3$ )  $\delta$  2.64 (s, 3H), 7.38-7.50 (m, 3H), 7.62-7.70 (m, 4H), 8.04 (d,  $J = 8.29$  Hz, 2H);  $^{13}\text{C}$  NMR ( $\text{CDCl}_3$ )  $\delta$  26.76, 127.31, 127.37, 128.34, 129.02, 129.06, 135.94, 139.95, 145.86, 197.86.

**Compound 1g:**<sup>2</sup> (Table 2, entry 7)  $^1\text{H}$  NMR ( $\text{CDCl}_3$ )  $\delta$  7.39-7.44 (m, 2H), 7.47-7.54 (m, 4H), 7.64-7.69 (m, 4H);  $^{13}\text{C}$  NMR ( $\text{CDCl}_3$ )  $\delta$  127.18, 127.26, 128.77, 141.25.

**Compound 1h:**<sup>3</sup> (Table 2, entry 8) <sup>1</sup>H NMR (CDCl<sub>3</sub>) δ 3.90 (s, 3H), 6.95 (dd, *J* = 8.07, 2.0 Hz, 1H), 6.97-7.25 (m, 2H), 7.38-7.42 (m, 2H), 7.49 (t, *J* = 7.6 Hz, 2H), 7.65 (d, *J* = 7.24 Hz, 2H); <sup>13</sup>C NMR (CDCl<sub>3</sub>) δ 55.37, 112.78, 113.01, 119.79, 127.30, 127.52, 128.84, 129.86, 141.21, 142.87, 160.05.

**Compound 1i:**<sup>1</sup> (Table 2, entry 9) <sup>1</sup>H NMR (CDCl<sub>3</sub>) δ 3.87 (s, 3H), 7.00 (d, *J* = 8.65 Hz, 2H), 7.32 (t, *J* = 7.18 Hz, 1H), 7.43 (t, *J* = 7.28 Hz, 2H), 7.54-7.59 (m, 4H); <sup>13</sup>C NMR (CDCl<sub>3</sub>) δ 55.48, 114.35, 126.79, 126.88, 128.29, 128.86, 133.93, 140.98, 159.29.

**Compound 1j:**<sup>2</sup> (Table 2, entry 10) <sup>1</sup>H NMR (CDCl<sub>3</sub>) δ 2.26 (s, 3H), 7.17-7.25 (m, 4H), 7.29-7.34 (m, 3H), 7.37-7.42 (m, 2H); <sup>13</sup>C NMR (CDCl<sub>3</sub>) δ 20.59, 125.88, 126.88, 127.37, 128.18, 129.31, 129.92, 130.43, 135.46, 142.06, 142.09.

**Compound 1k:**<sup>4</sup> (Table 2, entry 11) <sup>1</sup>H NMR (CDCl<sub>3</sub>) δ 2.34 (s, 3H), 7.09 (d, *J* = 7.2 Hz, 1H), 7.16-7.38 (m, 6H), 7.51 (d, *J* = 7.53 Hz, 2H); <sup>13</sup>C NMR (CDCl<sub>3</sub>) δ 21.96, 124.68, 127.57, 127.59, 128.39, 128.41, 129.07, 129.10, 138.73, 141.65, 141.77.

**Compound 1l:**<sup>2</sup> (Table 2, entry 12) <sup>1</sup>H NMR (CDCl<sub>3</sub>) δ 2.34 (s, 3H), 7.19 (d, *J* = 7.57 Hz, 2H), 7.26-7.34 (m, 1H), 7.37 (t, *J* = 7.22 Hz, 2H), 7.44 (d, *J* = 7.59, 2H), 7.52 (d, *J* = 7.34, 2H); <sup>13</sup>C NMR (CDCl<sub>3</sub>) δ 21.24, 127.11, 127.14, 128.85, 129.62, 137.16, 138.50, 141.31.

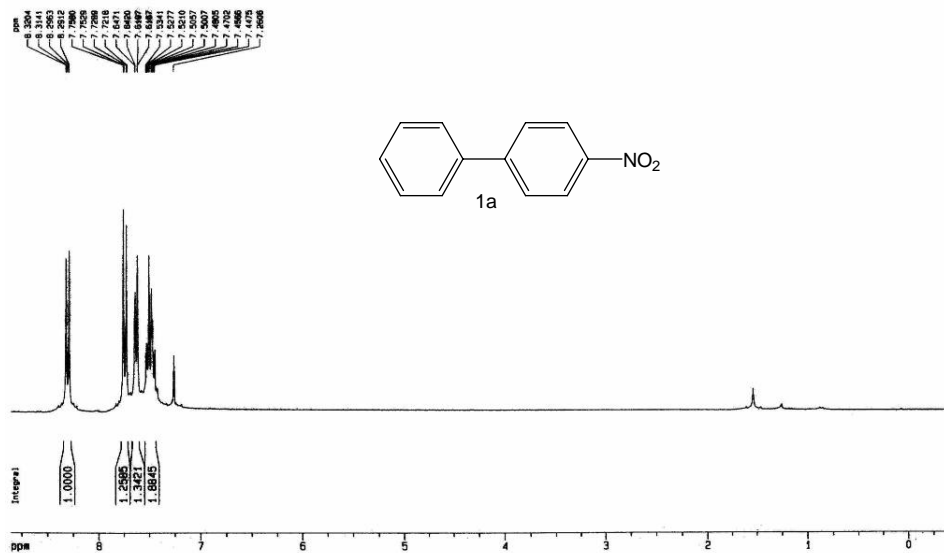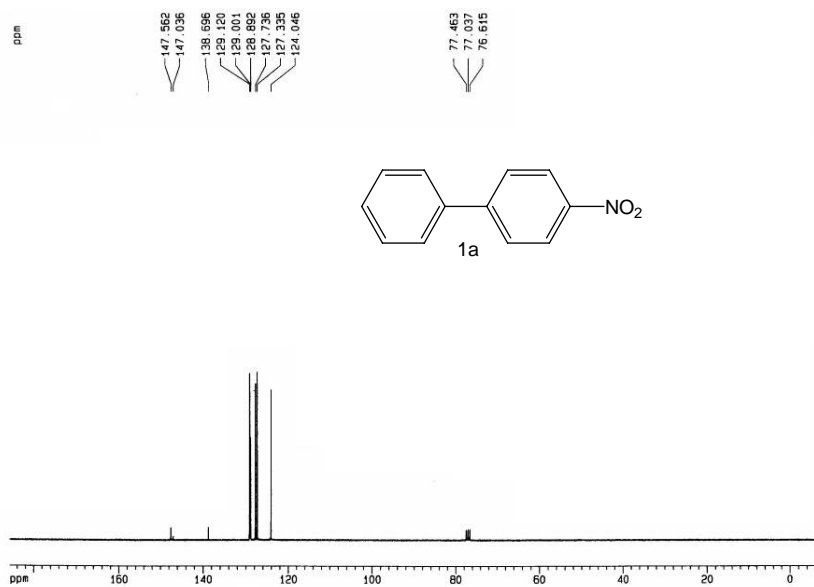

Current Data Parameters  
 NAME DKS-I-117-13C  
 EXPNO 1  
 PROCNO 1

F2 - Acquisition Parameters  
 Date\_ 500000  
 Time 19.52  
 INSTRUM dqx300  
 PROBRD 5 mm Multinu  
 PULPROG zgdc  
 TD 109152  
 SOLVENT CDCl3  
 NS 1487  
 DS 0  
 SMH 19841.270 Hz  
 FIDRES 0.181777 Hz  
 AQ 2.7506904 sec  
 RG 9192  
 DW 25.200 usec  
 DE 4.50 usec  
 TE 300.0 K.  
 d11 0.0300000 sec  
 RL12 16.00 dB  
 CPOPRG2 waitz16  
 PCPD2 100.00 usec  
 SF02 300.1314795 MHz  
 NUC2 1H  
 PL2 120.00 dB  
 D1 1.0000000 sec  
 P1 10.50 usec  
 DE 4.50 usec  
 SF01 75.4766447 MHz  
 NUC1 13C  
 PL1 -1.00 dB

F2 - Processing parameters  
 SI 65536  
 SF 75.4677535 MHz  
 NDM EM  
 SSB 0  
 LB 0.30 Hz  
 GB 0  
 PC 1.00

1D NMR plot parameters  
 CX 22.00 cm  
 F1P 185.742 ppm  
 F1 14017.51 Hz  
 F2P -6.147 ppm  
 F2 -453.91 Hz  
 PPMCM 8.72222 ppm/cm  
 HZCM 658.24640 Hz/cm

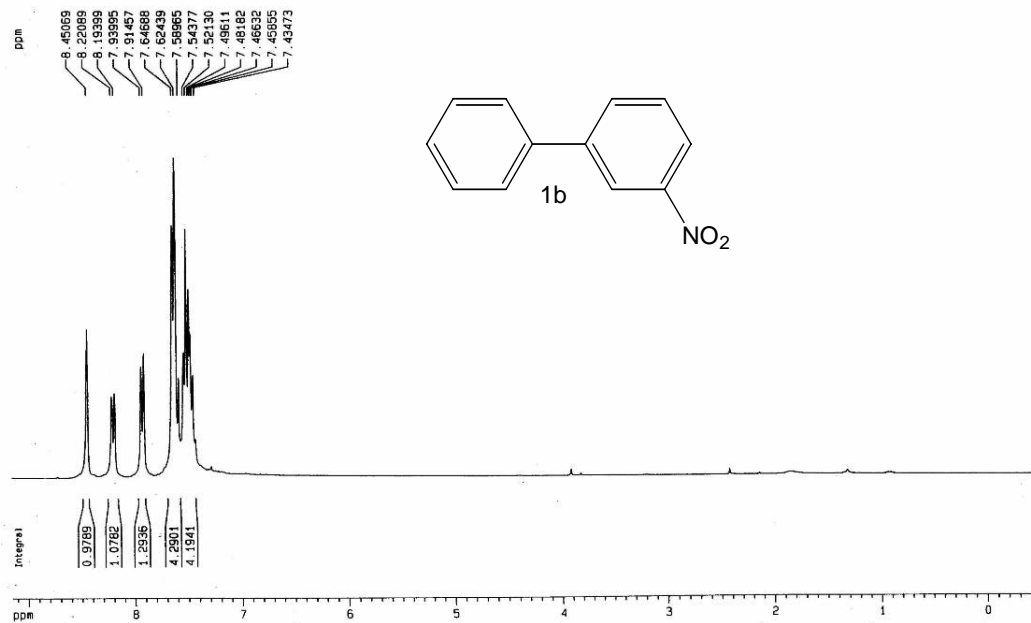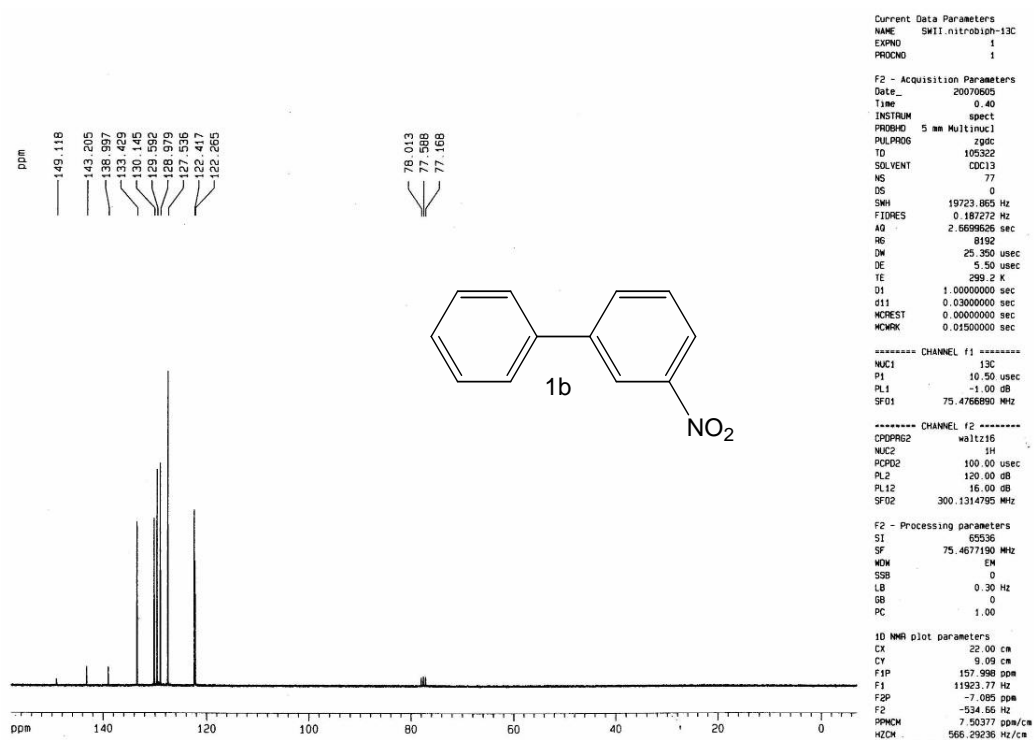

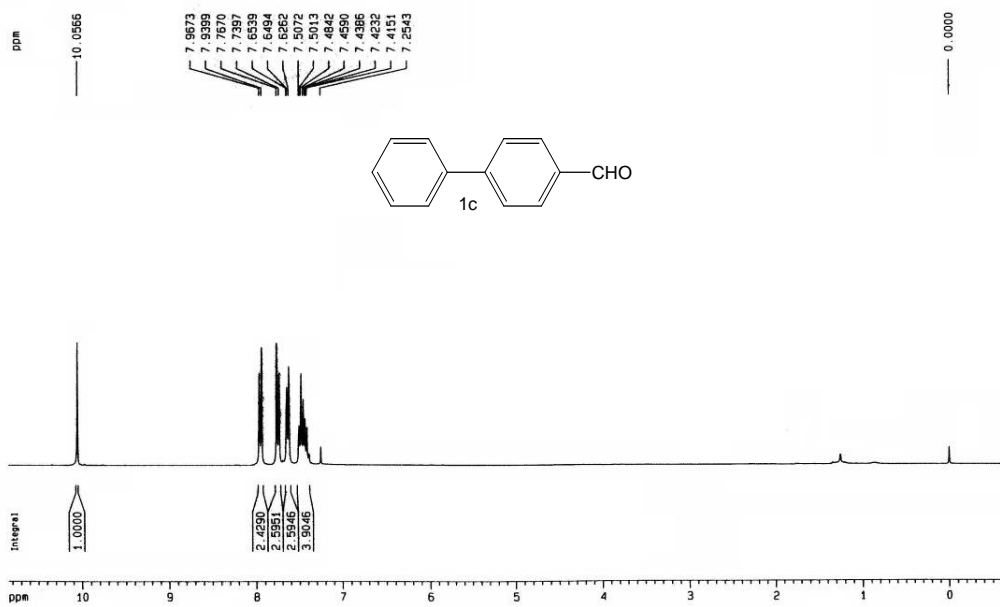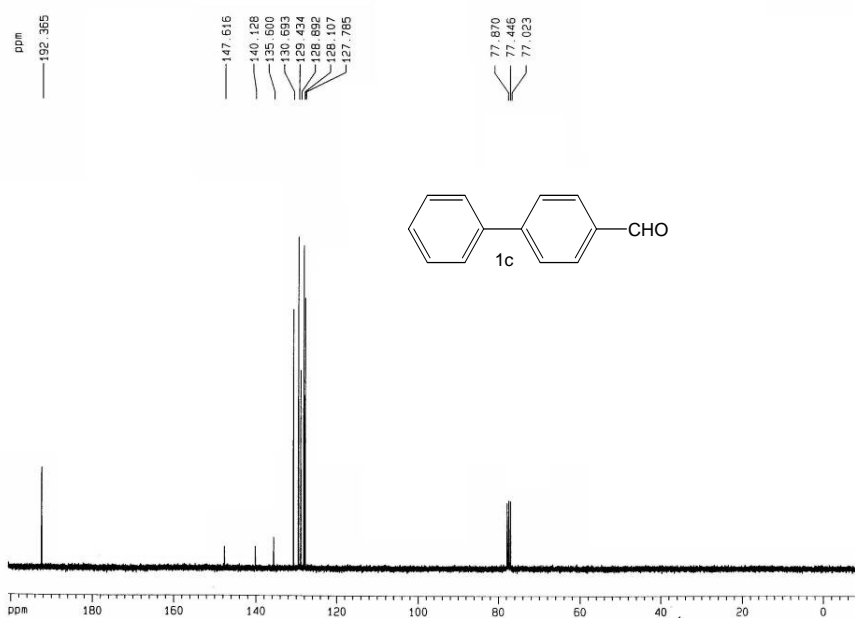

```

Current Data Parameters
NAME      DKS.1170-13C
EXPNO    1
PROCNO   1

F2 - Acquisition Parameters
Date_    20061218
Time     13.44
INSTRUM  spect
PROBHD   5 mm Multinucl
PULPROG  zgpg
TD        109152
SOLVENT  CDCl3
NS        214
DS        0
SWH       19723.865 Hz
FIDRES   0.180701 Hz
AQ        2.7670531 sec
RG         8192
DW         25.350 usec
DE         5.50 usec
TE         297.2 K
D1         1.00000000 sec
d11        0.03000000 sec
INCREST   0.00000000 sec
MCWPK     0.01500000 sec

===== CHANNEL f1 =====
NUC1      13C
P1         10.50 usec
PL1        -1.00 dB
SFO1      75.4766890 MHz

===== CHANNEL f2 =====
CPDPRG2  waltz16
NUC2      1H
PCPD2     100.00 usec
PL2        120.00 dB
PL12       16.00 dB
SFO2      300.1314795 MHz

F2 - Processing parameters
SI         65936
SF         75.4677190 MHz
WDW        EM
SSB        0
LB         0.30 Hz
GB         0
PC         1.00

1D NMR plot parameters
CX         22.00 cm
CY         8.50 cm
F1P        200.708 ppm
F1         15146.95 Hz
F2P        -8.063 ppm
F2         -608.50 Hz
F0MCH      0.40855 ppm/cm
H2DM       716.15178 Hz/cm
    
```

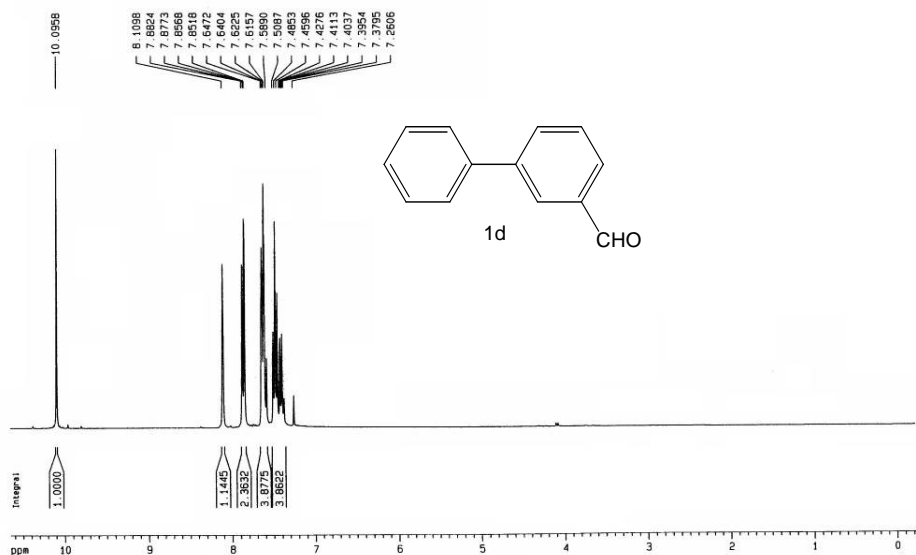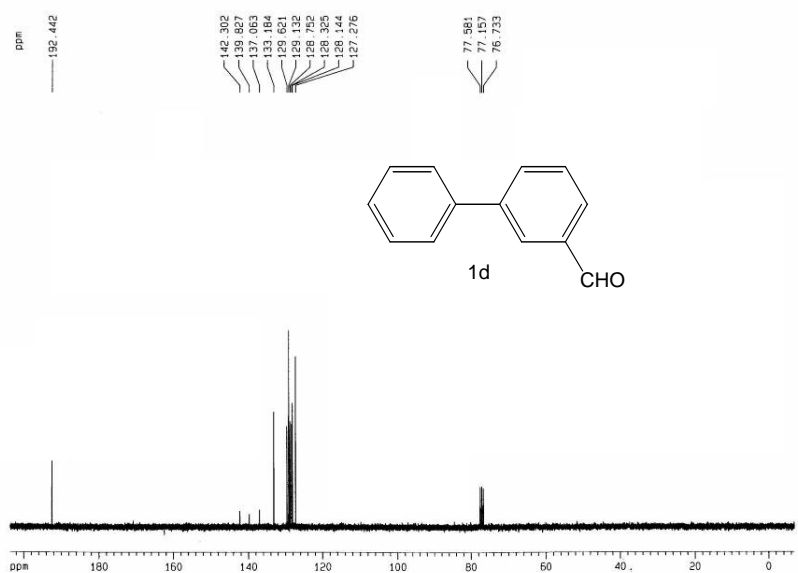

```

Current Data Parameters
NAME      DKS-1-151-13C
EXPNO    1
PROCNO   1

F2 - Acquisition Parameters
Date_    20060919
Time     20.20
INSTRUM spect
PROBHD   5 mm Multinuc1
PULPROG zgpg
TD        78382
SOLVENT  CDCl3
NS        81
DS        0
SWH       19841.270 Hz
FIDRES   0.250010 Hz
AQ       1.9999723 sec
RG        8192
DM       25.300 usec
DE       5.50 usec
TE       299.2 K
D1       1.0000000 sec
d11      0.0300000 sec
MCREST   0.0000000 sec
MCMARK   0.0150000 sec

***** CHANNEL f1 *****
NUC1      13C
P1        10.50 usec
PL1       -1.00 dB
SFO1     75.4765414 MHz

***** CHANNEL f2 *****
CPDPRG2  waltz15
NUC2      1H
PCPD2    100.00 usec
PL2       120.00 dB
PL12     15.00 dB
SFO2    300.1314795 MHz

F2 - Processing parameters
SI        65536
SF       75.4677390 MHz
WDW       EM
SSB       0
LB       0.30 Hz
GB        0
PC        1.00

1D NMR plot parameters
CX       22.00 cm
CY       5.49 cm
F1P     203.683 ppm
F1       15371.47 Hz
F2P     -6.836 ppm
F2       -515.92 Hz
PPHMC   9.56905 ppm/cm
H2CMA   722.15424 Hz/cx
    
```

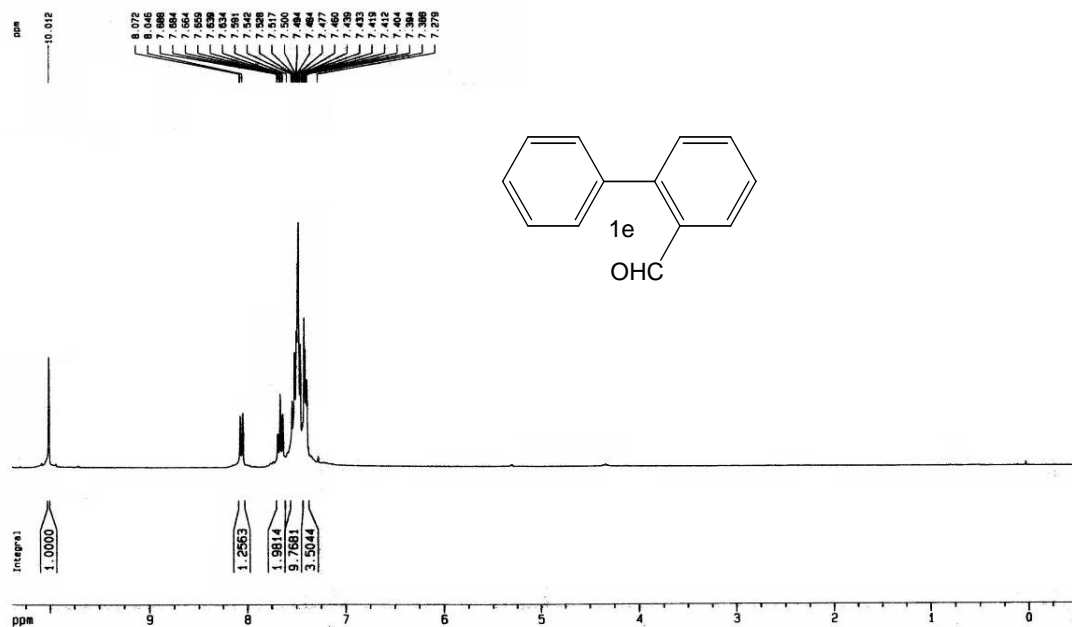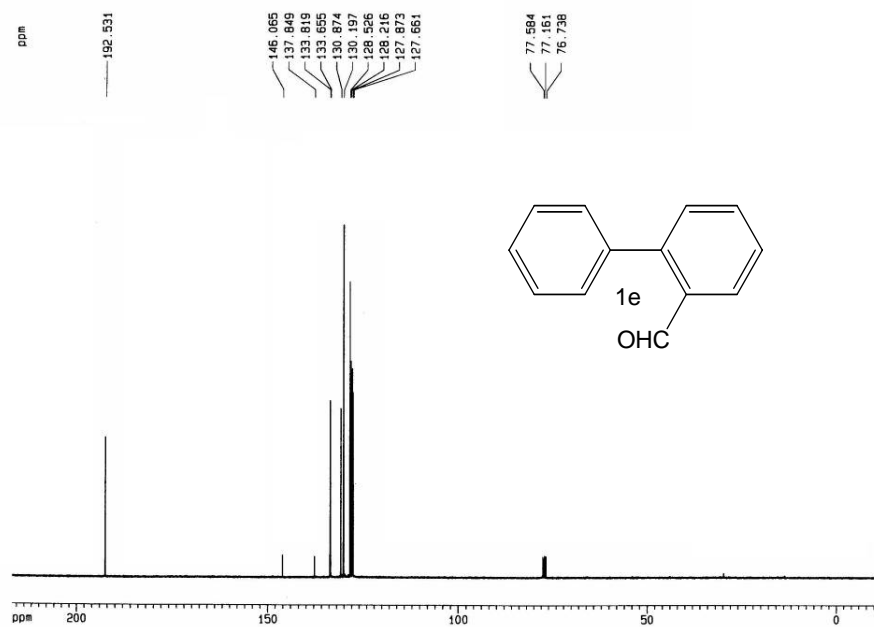

Current Data Parameters  
NAME DKS-1-141-13C  
EXPNO 1  
PROCNO 1

F2 - Acquisition Parameters  
Date\_ 500000  
Time 13.14  
INSTRUM dpx300  
PROBHD 5 mm Multinu  
PULPROG zgdc  
TO 109152  
SOLVENT CDCl3  
NS 1024  
DS 0  
SWH 22675.736 Hz  
FIDRES 0.207745 Hz  
AQ 2.4068515 sec  
RG 8192  
DW 22.050 usec  
DE 4.50 usec  
TE 300.0 K  
d11 0.0300000 sec  
PL12 16.00 dB  
CPOPRG2 waltz16  
PCPD2 100.00 usec  
SFO2 300.1314795 MHz  
NUC2 1H  
PL2 120.00 dB  
D1 1.00000000 sec  
P1 10.50 usec  
DE 4.50 usec  
SFO1 75.4752658 MHz  
NUC1 13C  
PL1 -1.00 dB

F2 - Processing parameters  
SI 65536  
SF 75.4677428 MHz  
WDW EM  
SSB 0  
LB 0.30 Hz  
GB 0  
PC 1.00

1D NMR plot parameters  
CX 22.00 cm  
F1P 217.067 ppm  
F1 16381.59 Hz  
F2P -11.053 ppm  
F2 -834.14 Hz  
PPMCH 10.36911 ppm/cm  
HZCM 782.53320 Hz/cm



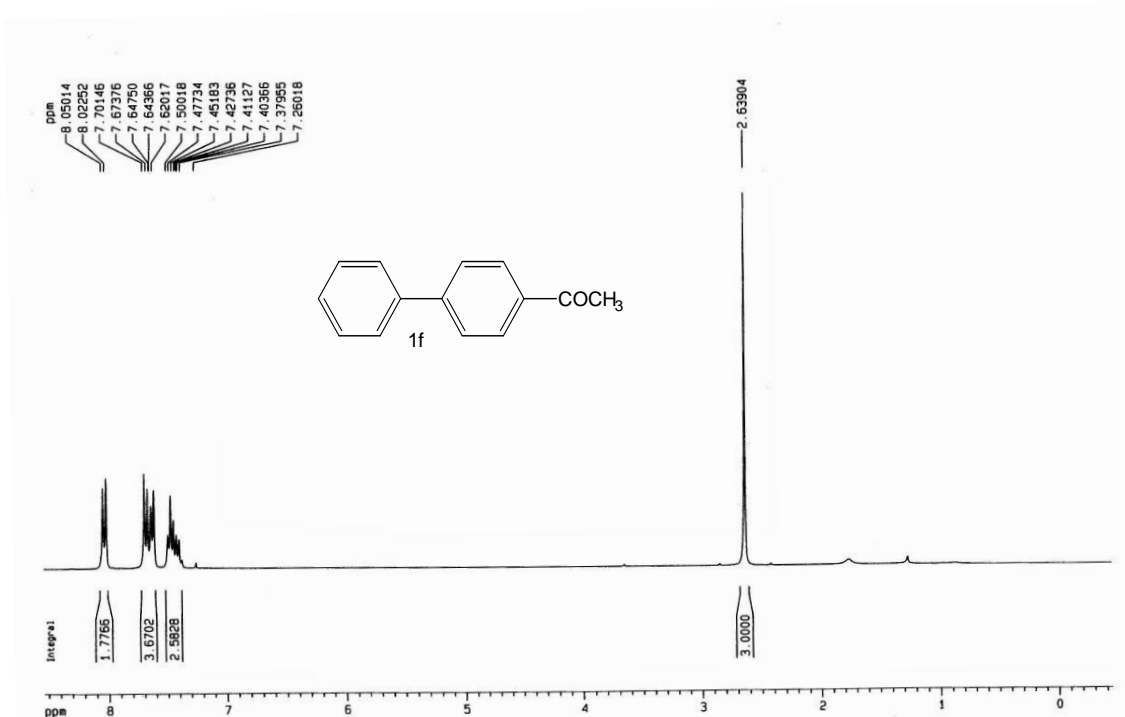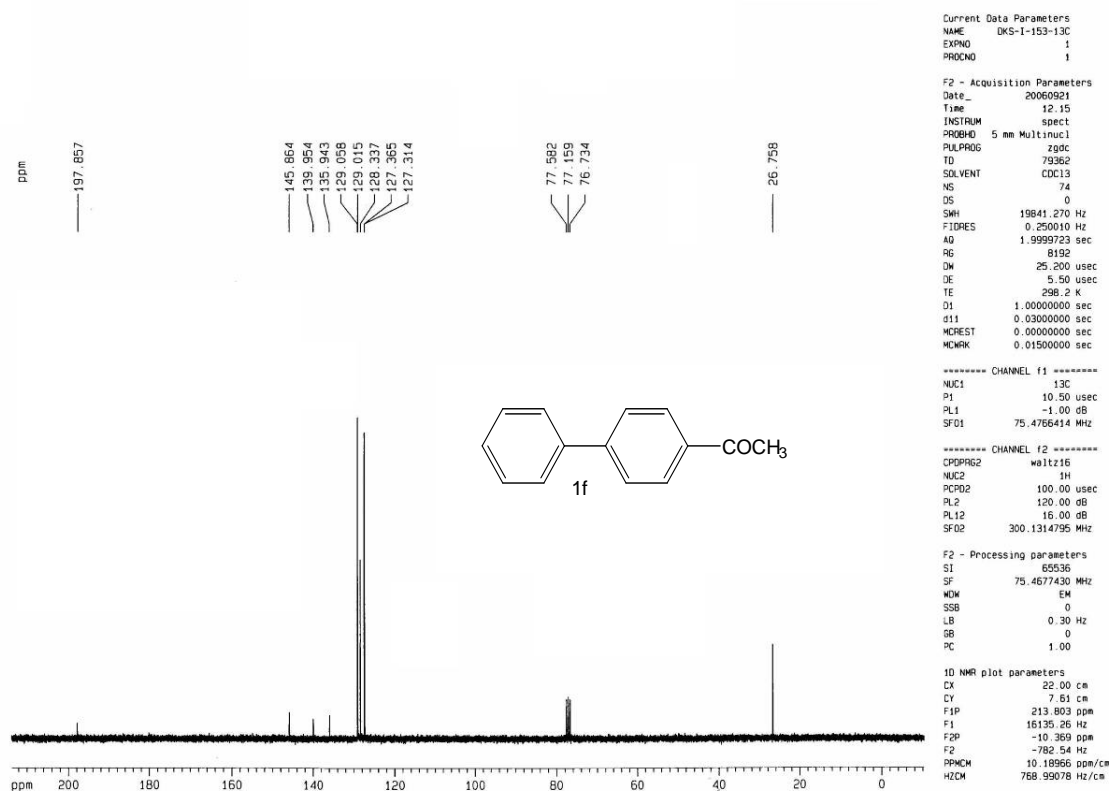

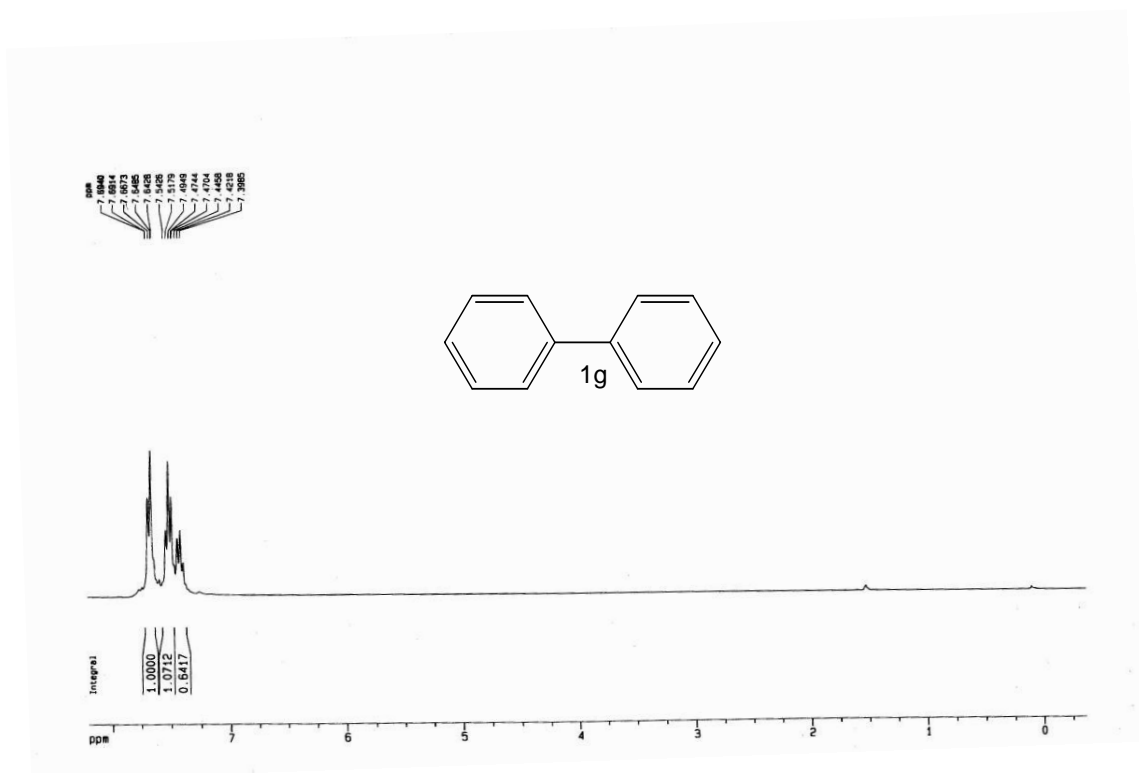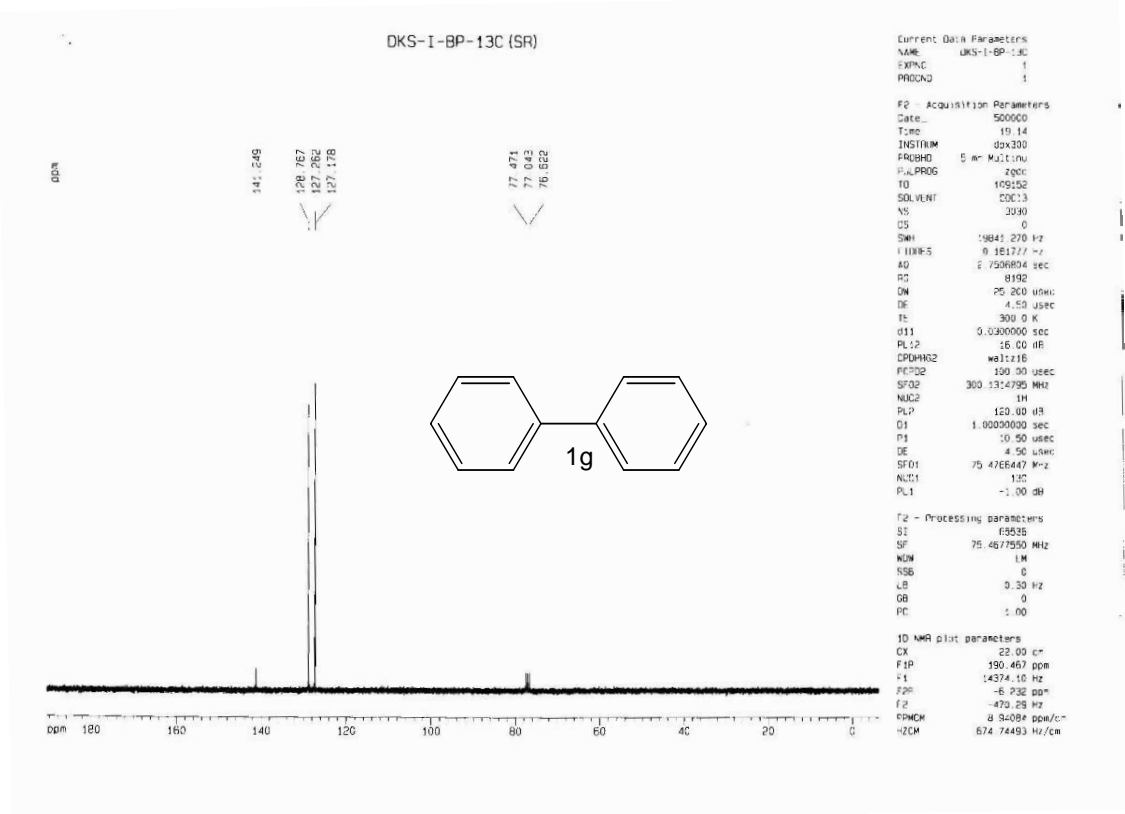

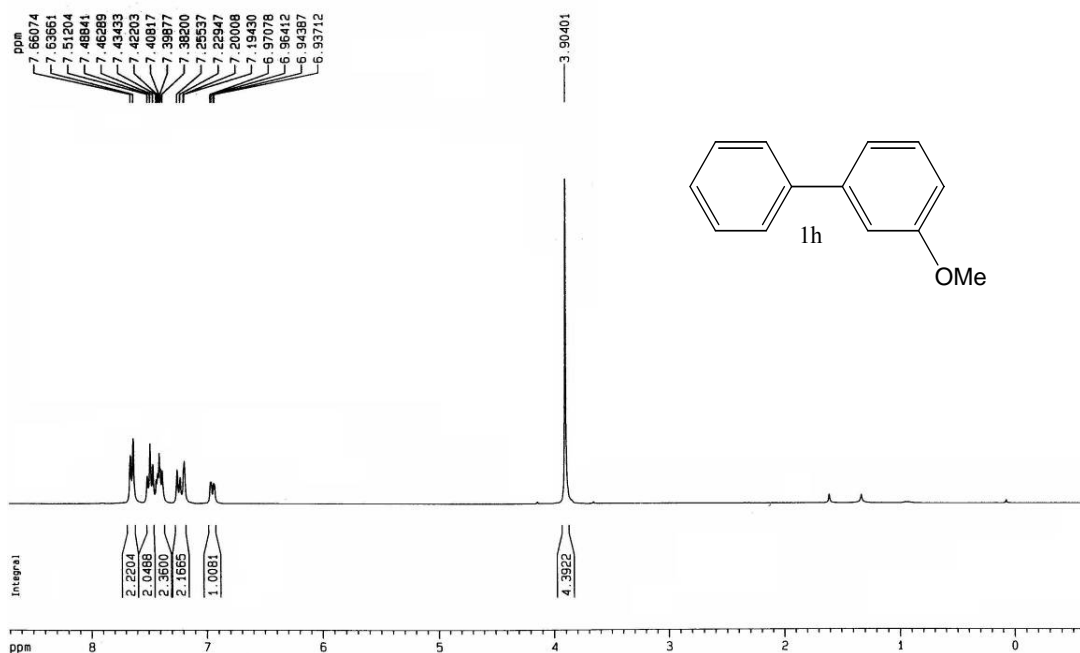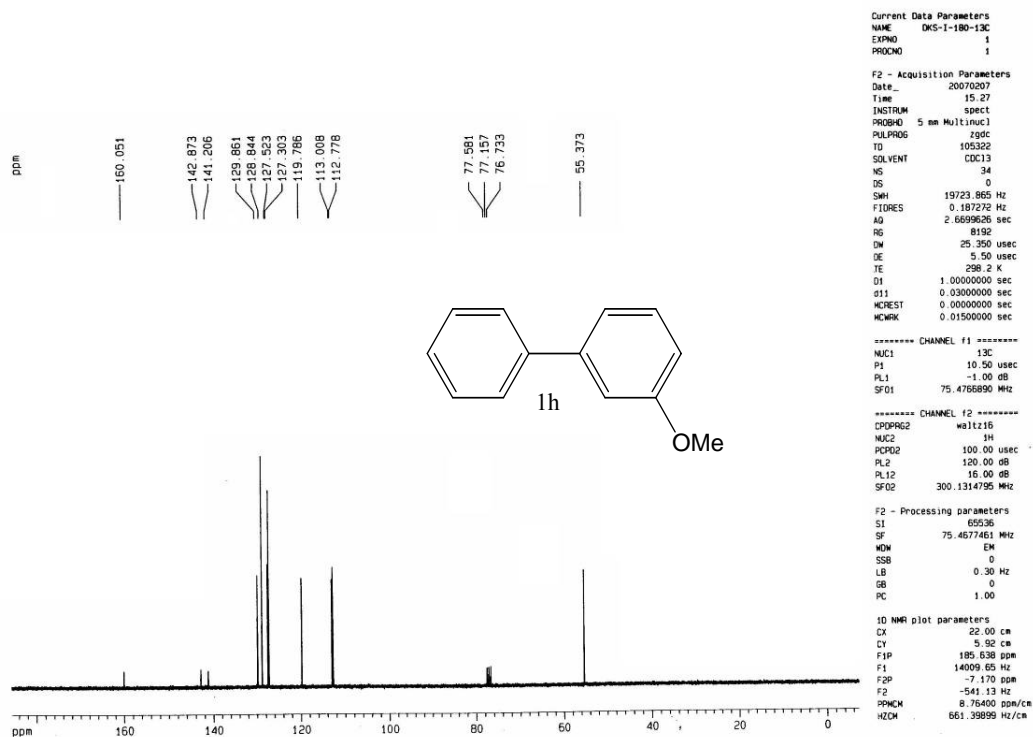

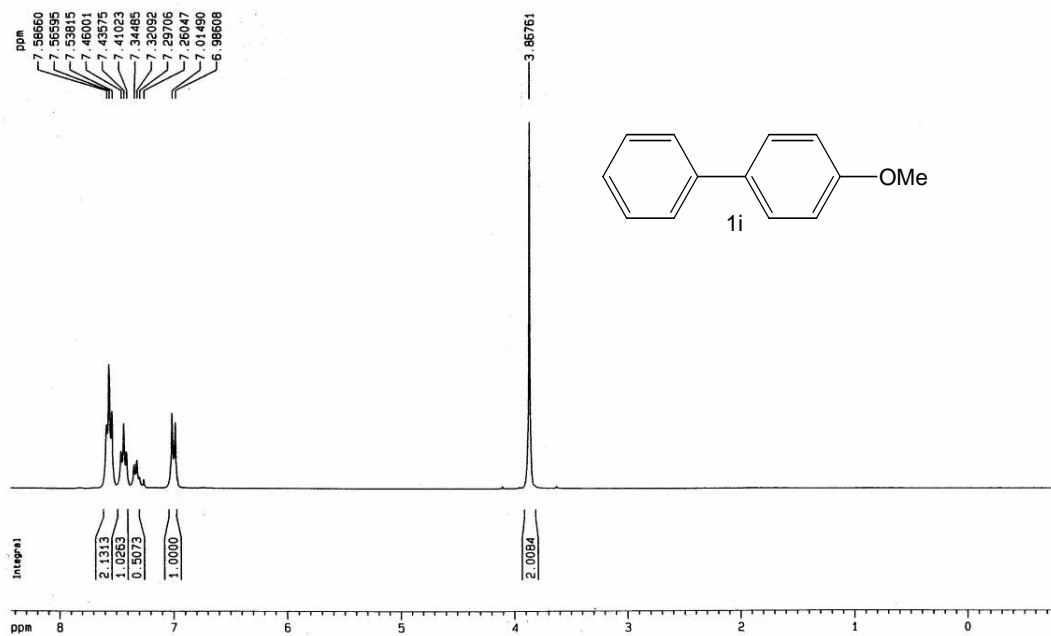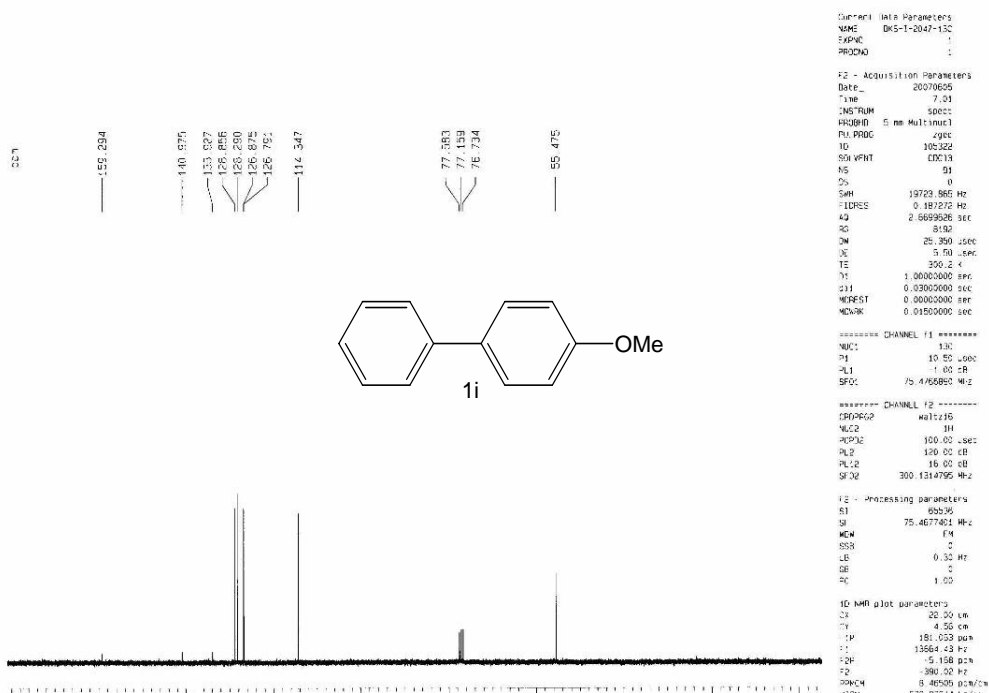

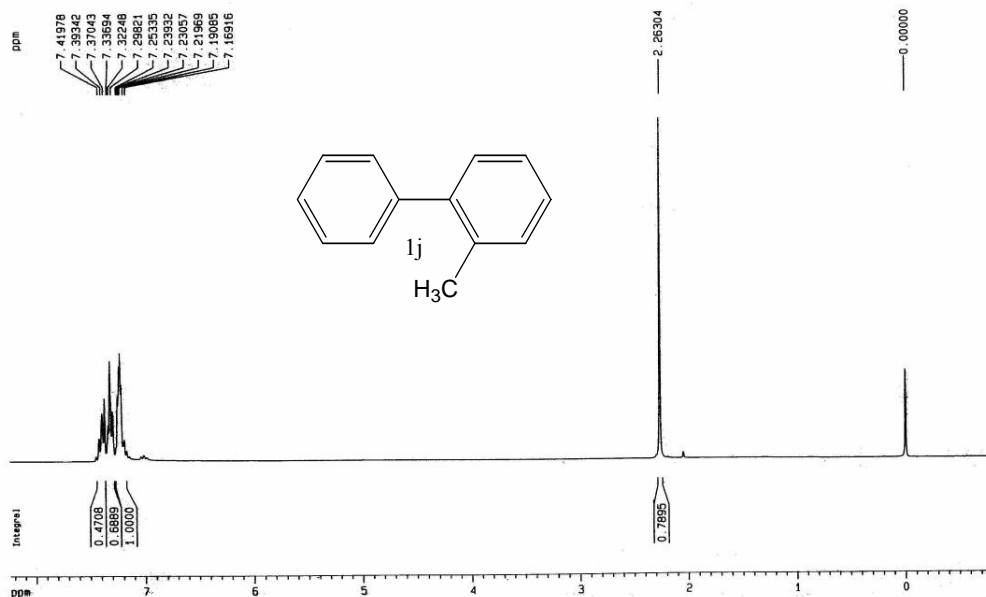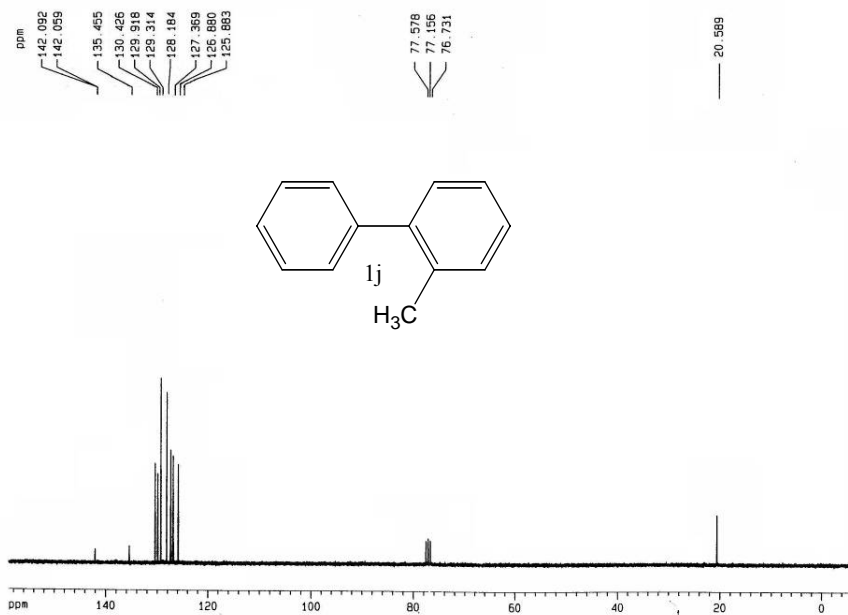

Current Data Parameters  
 NAME DKS-I-168-13C  
 EXPNO 1  
 PROCNO 1

F2 - Acquisition Parameters  
 Date\_ 20061129  
 Time 19.28  
 INSTRUM spect  
 PROBRD 5 mm Multinucl  
 PULPROG zgpg30  
 TD 109152  
 SOLVENT CDCl3  
 NS 44  
 DS 6  
 SMH 18832.393 Hz  
 FIDRES 0.172534 Hz  
 AQ 2.8980355 sec  
 RG 8152  
 DW 26.450 usec  
 DE 5.50 usec  
 TE 298.2 K  
 D1 1.0000000 sec  
 d11 0.0300000 sec  
 MCREST 0.0000000 sec  
 MCMRK 0.0150000 sec

\*\*\*\*\* CHANNEL f1 \*\*\*\*\*  
 NUC1 13C  
 P1 10.50 usec  
 PL1 -1.00 dB  
 SF01 75.4756078 MHz

\*\*\*\*\* CHANNEL f2 \*\*\*\*\*  
 CROPRG2 waltz16  
 NUC2 1H  
 P2 100.00 usec  
 PL2 120.00 dB  
 PL12 16.00 dB  
 SF02 300.1314795 MHz

F2 - Processing parameters  
 SI 65536  
 SF 75.4677442 MHz  
 MDW EM  
 SSB 0  
 LB 0.30 Hz  
 GB 0  
 PC 1.00

1D NMR plot parameters  
 CX 22.00 cm  
 CY 4.76 cm  
 F1P 158.972 ppm  
 F1 11997.28 Hz  
 F2P -5.751 ppm  
 F2 -434.80 Hz  
 PPHCM 7.48790 ppm/cm  
 HZCM 565.09491 Hz/cm

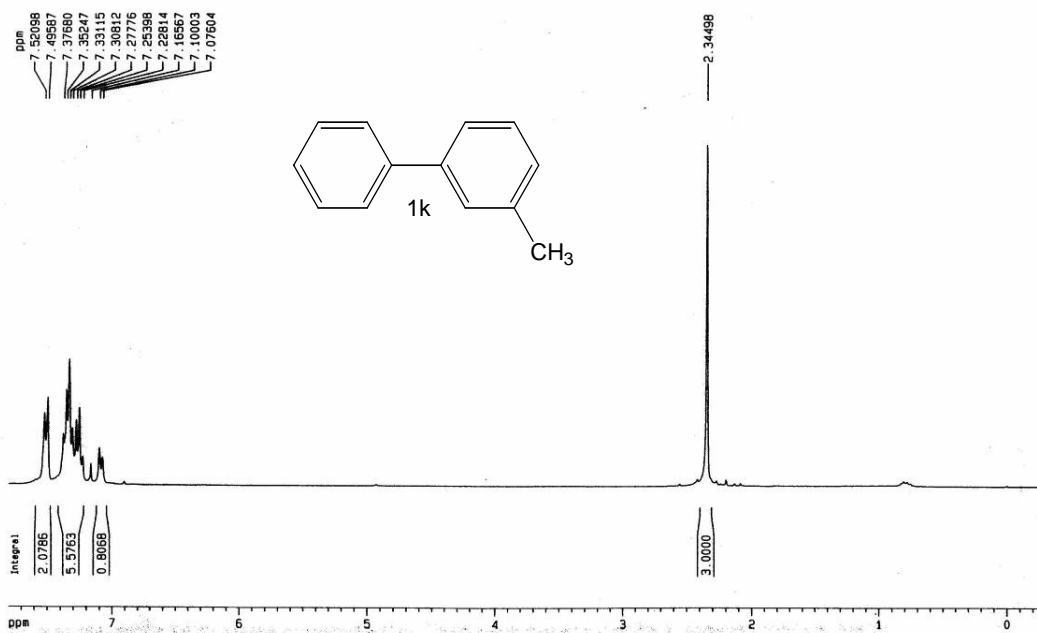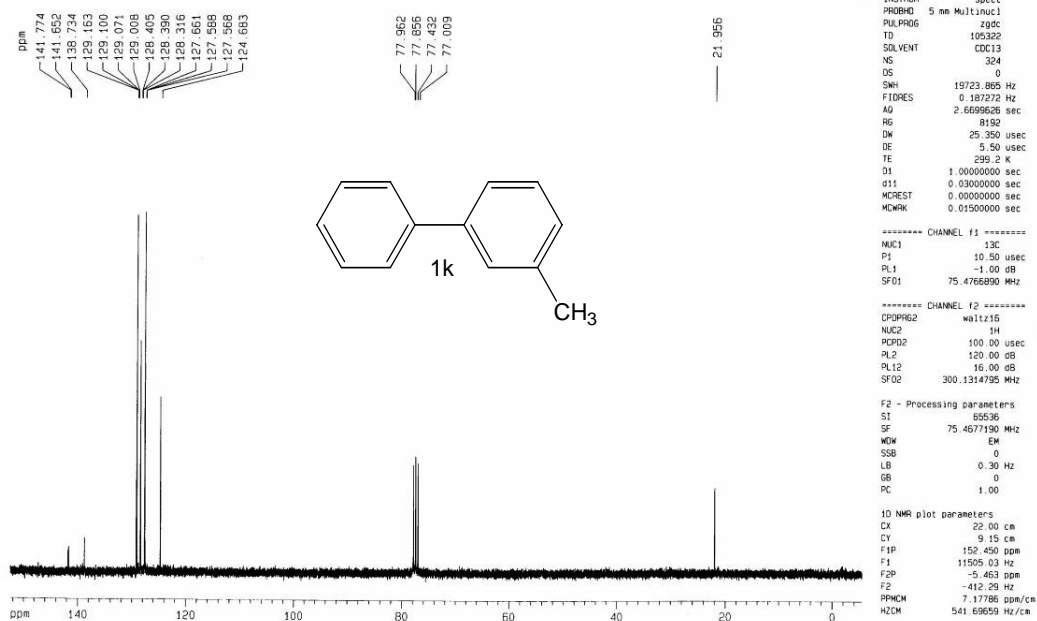

Current Data Parameters  
 NAME DKS12032-13C  
 EXPNO 1  
 PROCNO 1

F2 - Acquisition Parameters  
 Date\_ 20070604  
 Time 22.32  
 INSTRUM spect  
 PROBHD 5 mm Multinucl  
 PULPROG zgpg  
 TD 105322  
 SOLVENT CDCl3  
 NS 324  
 DS 0  
 SWH 19723.865 Hz  
 FIDRES 0.187272 Hz  
 AQ 2.669926 sec  
 RG 8192  
 DM 25.350 usec  
 DE 5.50 usec  
 TE 299.2 K  
 D1 1.00000000 sec  
 d11 0.03000000 sec  
 MCREST 0.00000000 sec  
 MDWAK 0.01500000 sec

\*\*\*\*\* CHANNEL f1 \*\*\*\*\*  
 NUC1 13C  
 P1 10.50 usec  
 PL1 -1.00 dB  
 SF01 75.476890 MHz

\*\*\*\*\* CHANNEL f2 \*\*\*\*\*  
 DPUPRG2 waltz16  
 NUCE 1H  
 PPRP2 100.00 usec  
 PL2 120.00 dB  
 PL12 16.00 dB  
 SF02 300.1314795 MHz

F2 - Processing parameters  
 SI 65536  
 SF 75.4677198 MHz  
 WDW EM  
 SSB 0  
 LB 0.30 Hz  
 GB 0  
 PC 1.00

1D NMR plot parameters  
 CX 22.00 cm  
 CY 9.15 cm  
 FIP 152.450 ppm  
 F1 11505.03 Hz  
 F2P -5.463 ppm  
 F2 -412.29 Hz  
 PPMCH 7.17786 ppm/cm  
 HZCM 541.69655 Hz/cm

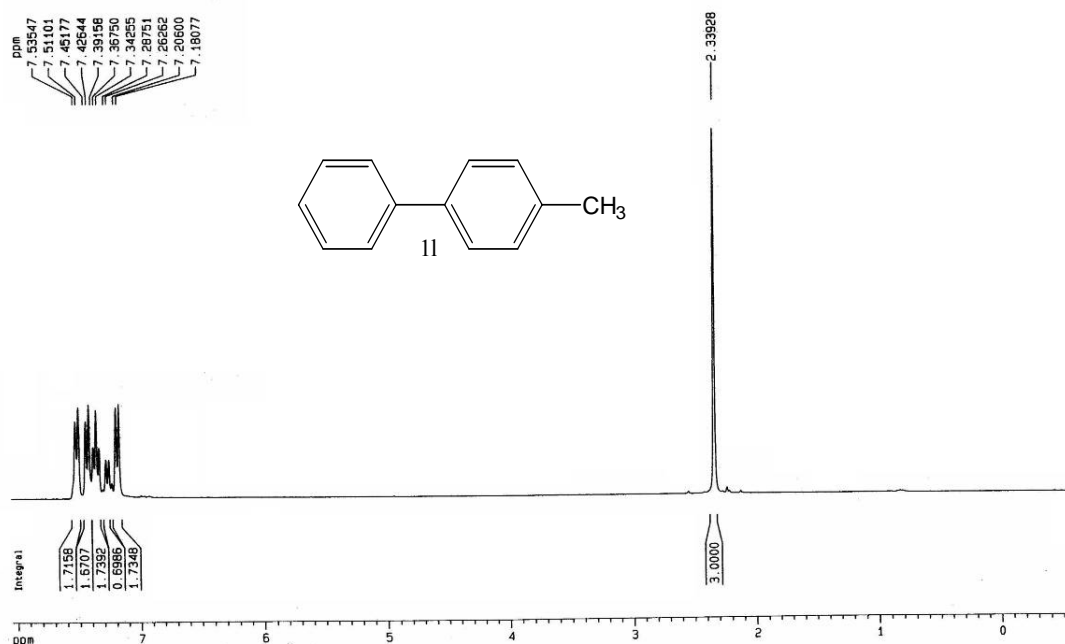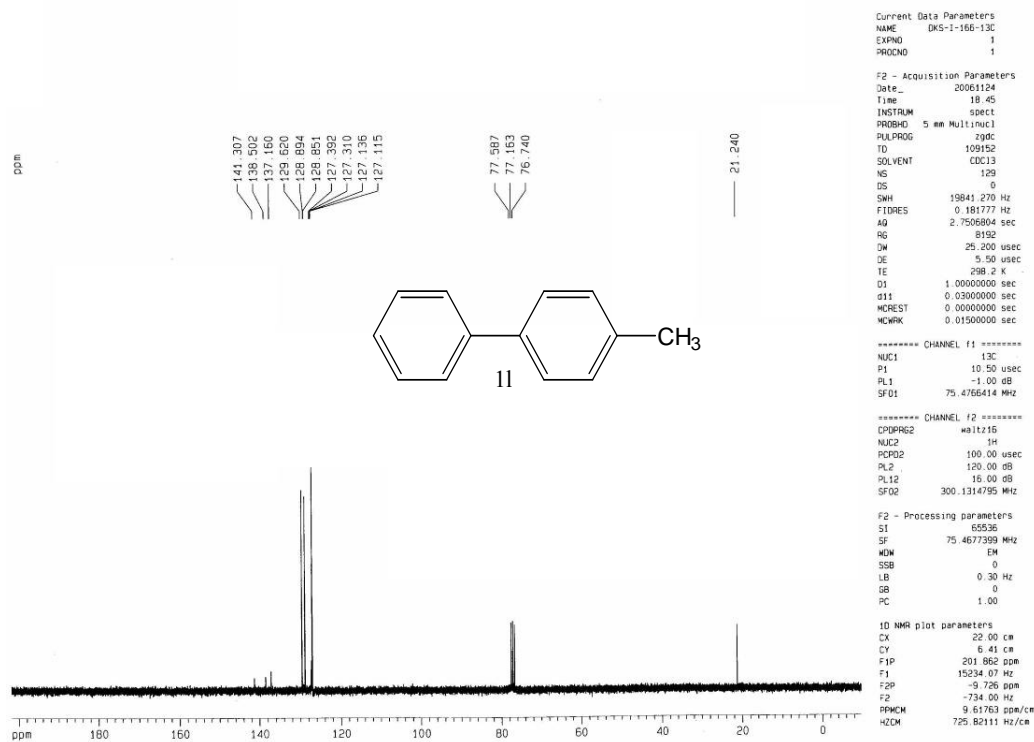

**References:**

- 1 B. Tao and D.W. Boykin, *J. Org. Chem.*, 2004, **69**, 4330-4335.
- 2 L. Wu, B.-L. Li, Y.-Y. Huang, H.-F. Zhou, Y.-M. He and Q.-H. Fan, *Org. Lett.*, 2006, **8**, 3605-3608.
- 3 T. Mino, Y. Shirae, M. Sakamoto and T. Fujita, *J. Org. Chem.*, 2005, **70**, 2191-2194.
- 4 P.D. Stevens, J. Fan, H. M. R. Gardimalla, M. Yen and Y. Gao, *Org. Lett.*, 2005, **7**, 2085-2088.
